# Supplementary material for: Apobec1 complementation factor overexpression promotes hepatic steatosis, fibrosis, and hepatocellular cancer
Source: JCI journal article supplement (doi:10.1172/jci138699), 2020-09-17
Supplement: sd1 [file 1]

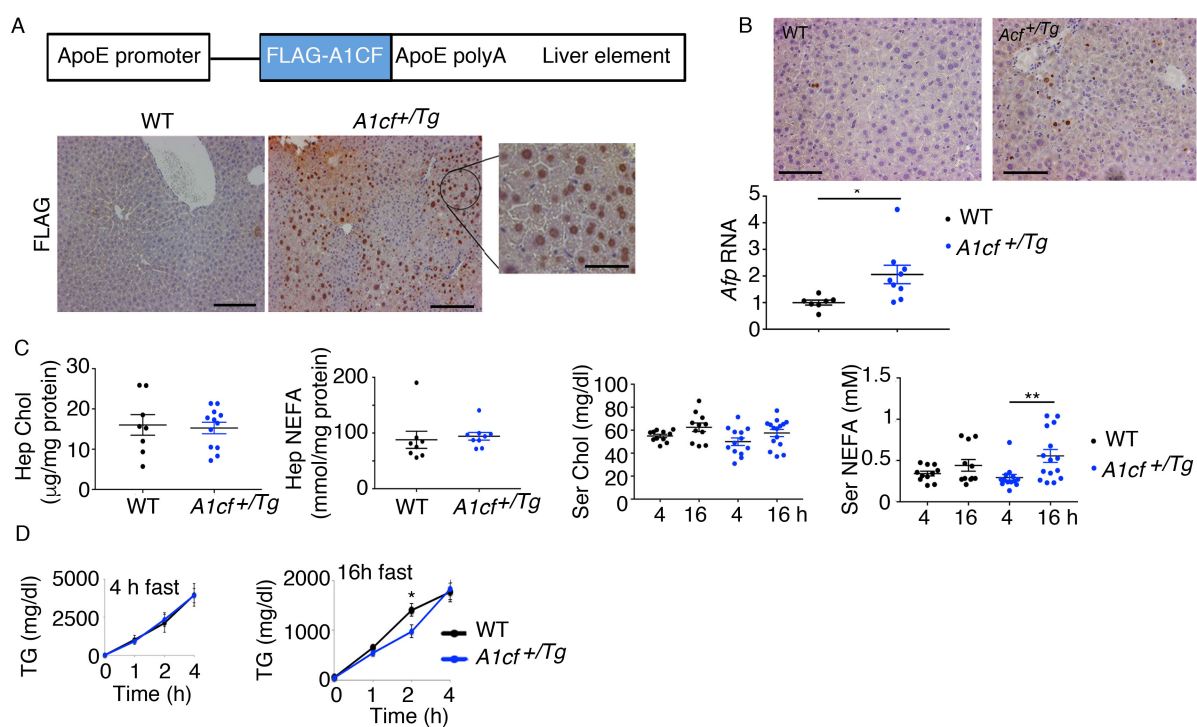

Supplemental Figure 1

**Supplemental Figure 1.** Baseline characterization of 12-week-old chow fed *A1cf*<sup>+Tg</sup> mice. **(A)** Diagram of the ApoE-A1cf transgenic construct. *A1cf* transgene is expressed as a N-terminal FLAG-tagged protein. A1CF transgene is detectable by immunohistochemistry using anti-FLAG antibody and appears highly expressed in nuclear compartment of hepatocytes. Scale bars: main panel: 100  $\mu$ m; inset: 50  $\mu$ m. **(B)** Representative images of proliferative hepatocytes labeled with BrdU in *A1cf*<sup>+Tg</sup> mice (related to Figure 1B) Scale bars: 50  $\mu$ m. Hepatic *Afp* RNA expression in *A1cf*<sup>+Tg</sup> mice evaluated by QPCR (n=7-9 animals per genotype). Data are mean  $\pm$  SE. \*  $P < 0.05$  (unpaired t-test). **(C)** Hepatic cholesterol and NEFA content were determined biochemically and normalized to hepatic protein. Values are means  $\pm$  SE from 8-12 mice per genotype. Biochemical determination of serum cholesterol and NEFA in chow-fed *A1cf*<sup>+Tg</sup> mice after a 4 or 16 h fast; n=11-15 animals per genotype and fasting condition. Data are means  $\pm$  SE, \*\*  $P < 0.01$  (unpaired t-test). **(D)** Plasma VLDL-TG secretion rate in *A1cf*<sup>+Tg</sup> mice fasted for 4 or 16 h and injected with Pluronic F-127. Each point represents mean  $\pm$  SE (n=2-6 mice per genotype) \*  $P < 0.05$  (unpaired t-test).

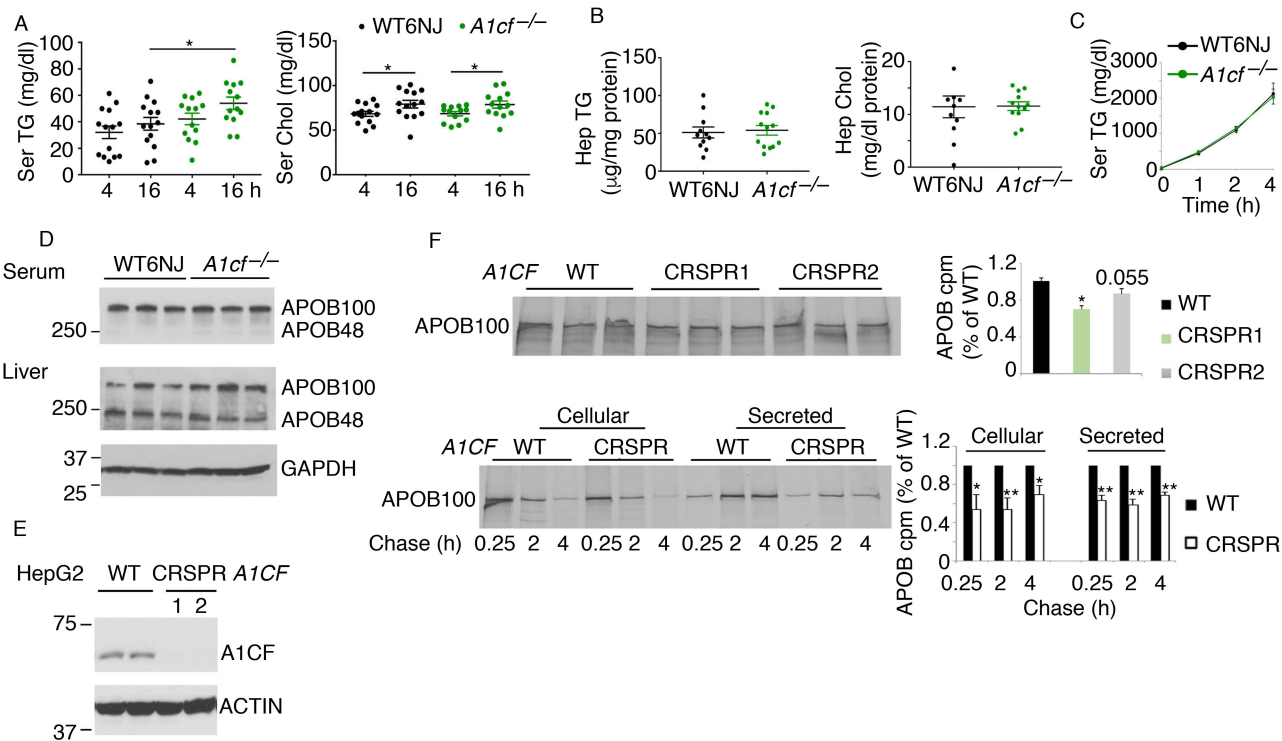

**Supplemental Figure 2.** *A1cf*<sup>-/-</sup> mice show no alteration of APOB and VLDL secretion. (A) Serum TG and cholesterol in chow-fed *A1cf*<sup>-/-</sup> mice after a 4 or 16 h fast, n=13-14 animals per genotype and fasting condition. Data are means  $\pm$  SE, \*  $P < 0.05$  (unpaired t-test). (B) Hepatic TG and cholesterol contents normalized to hepatic protein. Values are means  $\pm$  SE from 11-13 mice per genotype. (C) Serum TG secretion rate in *A1cf*<sup>-/-</sup> mice following Pluronic F-127 injection after an overnight fast. Each point represents mean  $\pm$  SE (n=6 per genotype). (D) Western blot analysis of serum and hepatic APOB after a 4h fast. GAPDH was used as loading control. (E) Western blot validation of A1CF knockout in two separate HepG2 CRSPR *A1CF* clones. ACTIN was used as loading control. (F) APOB synthesis in 2 separate HepG2 CRISPR *A1CF* clones. Following 15 min incubation with <sup>35</sup>S-methionine, extracts were separated on a 4-15% SDS-PAGE. After autoradiography radiolabeled APOB was quantitated by determination of count (cpm) in APOB protein band and expressed as % of WT CPM. Data represent mean  $\pm$  SE (n=3 per clones). Cellular and secreted APOB was evaluated after pulse chase analysis. Autoradiograph is a representative image of two independent experiments, each performed with two separate HepG2 CRSPR *A1CF* clones. Quantitation of cellular and secreted APOB100 is shown in the graphical representation. Values for the HepG2 CRSPR *A1CF* represent mean  $\pm$  SE (2 separate clones/ 2 independent experiments) \*  $P < 0.05$ ; \*\*  $P < 0.01$  (unpaired t-test).



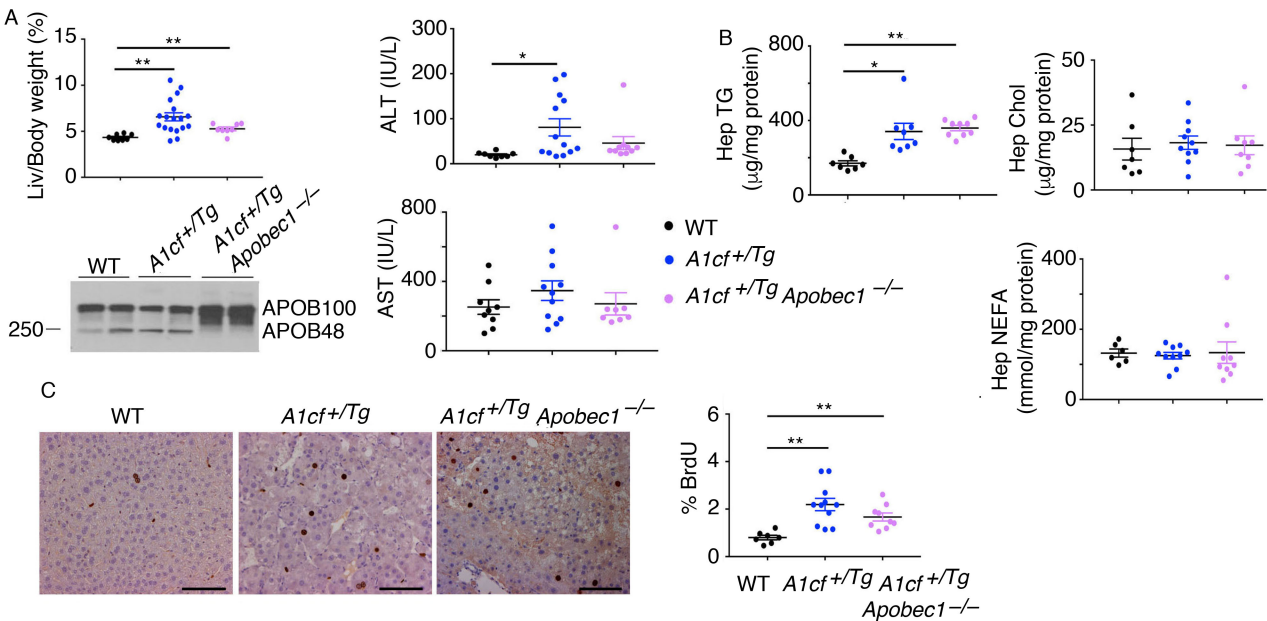

Supplemental Figure 3

**Supplemental Figure 3.** Characterization of chow-fed 12 month-old *A1cf*<sup>+Tg</sup> mice. **(A)** Liver to body weight ratio of aged *A1cf*<sup>+Tg</sup> (n=14) and *A1cf*<sup>+Tg</sup> *Apobec1*<sup>-/-</sup> (n=10), represented as mean  $\pm$  SE, \*\*  $P < 0.01$  (Unpaired t-test for individual comparison with WT control). Significance between means of the 3 groups was determined using one-way ANOVA,  $P$  value = 0.0021). Plasma ALT and AST in aged *A1cf*<sup>+Tg</sup> and *A1cf*<sup>+Tg</sup> *Apobec1*<sup>-/-</sup> mice (n=7-13) as mean  $\pm$  SE \*  $P < 0.05$  (Unpaired t-test). Significance between the 3 groups was determined using one-way ANOVA,  $P$  value = 0.0425. Lower panel, Western blot of APOB isoforms (B100 and B48) in serum of aged *A1cf*<sup>+Tg</sup> and *A1cf*<sup>+Tg</sup> *Apobec1*<sup>-/-</sup> mice. **(B)** Hepatic lipid in aged mice (n=7-10) represented as mean  $\pm$  SE, \*  $P < 0.05$ ; \*\*  $P < 0.01$  (Unpaired t-test for individual comparison with WT). Significance between the 3 groups was evaluated using one-way ANOVA,  $P = 0.0002$ ). **(C)** Hepatocytes stained with BrdU in aged *A1cf*<sup>+Tg</sup> and *A1cf*<sup>+Tg</sup> *Apobec1*<sup>-/-</sup> livers and proliferative index expressed as percent of BrdU-positive hepatocytes. Data represent means  $\pm$  SE (n=7-10) \*\*  $P < 0.01$  (unpaired t-test for individual comparison). One-way ANOVA was used to determined significance between all groups,  $P = 0.0006$ ). Scale bars: 50  $\mu$ m.

A

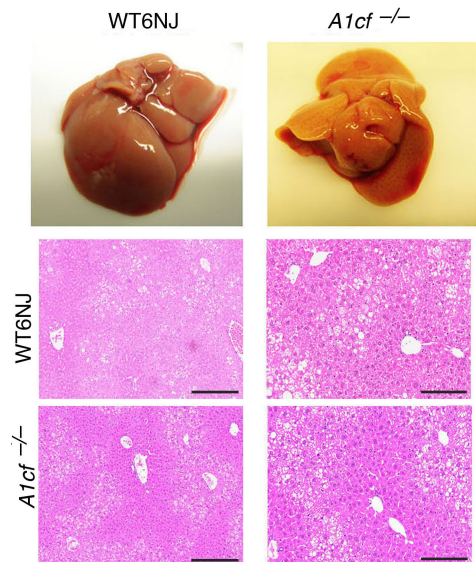

B

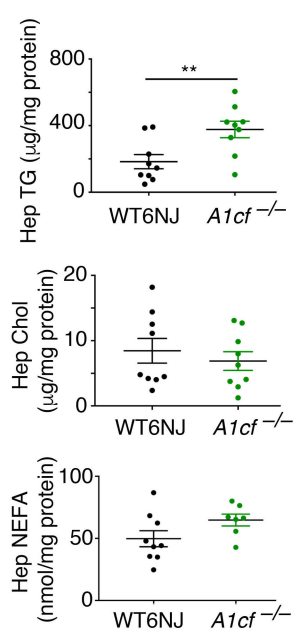

C

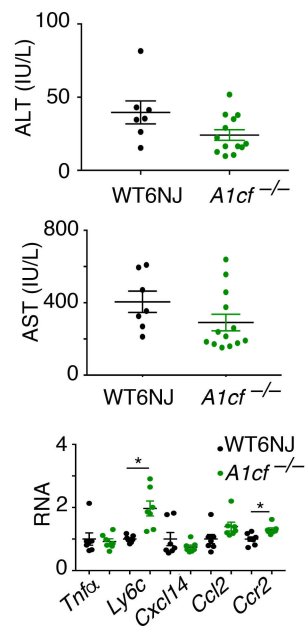

Supplemental Figure 4

**Supplemental Figure 4.** Chow-fed aged *A1cf*<sup>-/-</sup> do not develop spontaneous tumors. **(A)** Liver gross views and H&E sections from aged *A1cf*<sup>-/-</sup> mice. Scale bars: 100  $\mu$ m (left) and 50  $\mu$ m (right). **(B)** Hepatic lipid represented as mean  $\pm$  SE, \*\*  $P < 0.01$  (n=9) (Unpaired t-test). **(C)** Plasma ALT and AST in aged *A1cf*<sup>-/-</sup> mice shown as mean  $\pm$  SE (n=7-13). QPCR determination of Inflammatory markers RNA expression in aged *A1cf*<sup>-/-</sup> liver represented as mean  $\pm$  SE, \*  $P < 0.05$  (n=7) (Unpaired t-test).

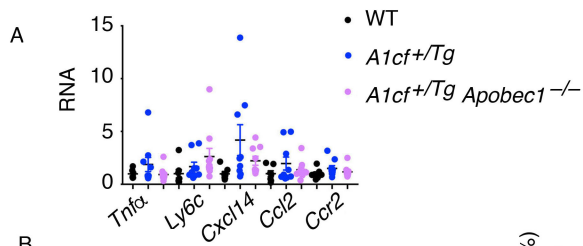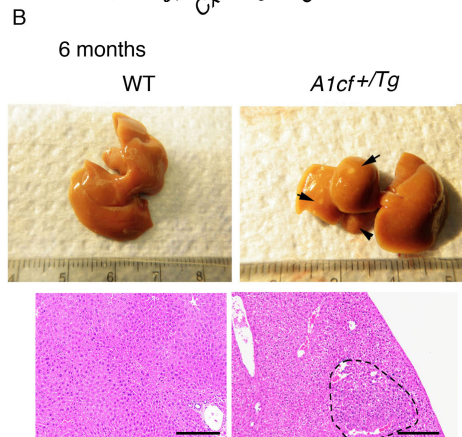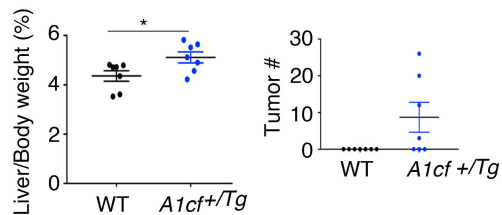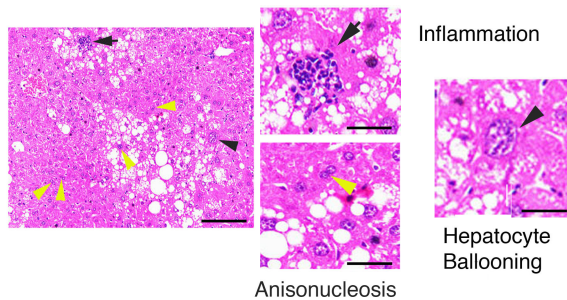

Supplemental Figure 5

**Supplemental Figure 5. (A)** QPCR evaluation of Inflammatory markers RNA expression in aged *A1cf*<sup>+/Tg</sup> and *A1cf*<sup>+/Tg</sup> *ApoBec1*<sup>-/-</sup> (n=7) as mean ± SE. **(B)** Livers from 6-month-old chow-fed *A1cf*<sup>+/Tg</sup> and H&E staining of liver sections. The arrows indicate macroscopic tumors (dashed area). Scale bars: 100 μm. Liver to whole body weight ratio as mean ± SE (n=7) \* *P* < 0.05 (Unpaired t-test). Tumor burden evaluated as number of macroscopically detectable tumors. Histological features of livers from 6-month-old chow-fed *A1cf*<sup>+/Tg</sup> mice. Black arrowheads: focal inflammation and hepatocyte ballooning. Yellow arrowheads: anisonucleosis. Scale bars: 50 μm.

A

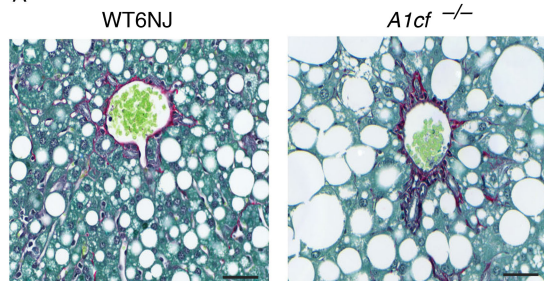

Fibrosis (% Total area)

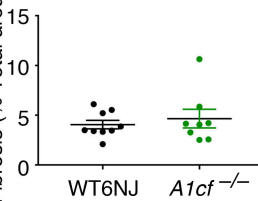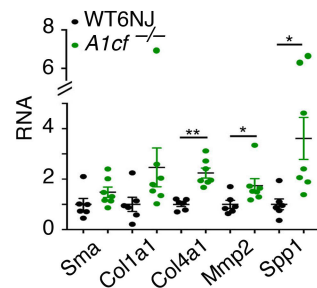

B

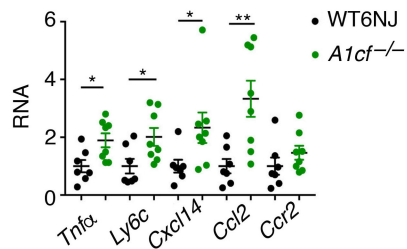

Supplemental Figure 6

**Supplemental Figure 6.** TFF-fed *A1cf*<sup>-/-</sup> mice exhibit similar fibrotic injury to WT controls but activation of inflammatory response. **(A)** Representative images of Sirius red staining of livers from *A1cf*<sup>-/-</sup> mice fed a TFF diet for 6 months. Scale bars: 20  $\mu$ m. Sirius red-positive area was expressed as percent total area (n=8-9 animals per genotype) and represented as mean  $\pm$  SE (n=8-9). Relative expression of fibrogenic genes evaluated by QPCR. Data represent mean  $\pm$  SE (n=6-7 per genotype). Unpaired t-test was used to determine significance between *A1cf*<sup>-/-</sup> and WT6NJ RNA samples. \*  $P < 0.05$ , \*\*  $P < 0.01$ . **(B)** Expression of inflammatory markers determined by QPCR. Data represent mean  $\pm$  SE (n=6 -8 per genotype), \*  $P < 0.05$ ; \*\*  $P < 0.01$  (Unpaired t-test).



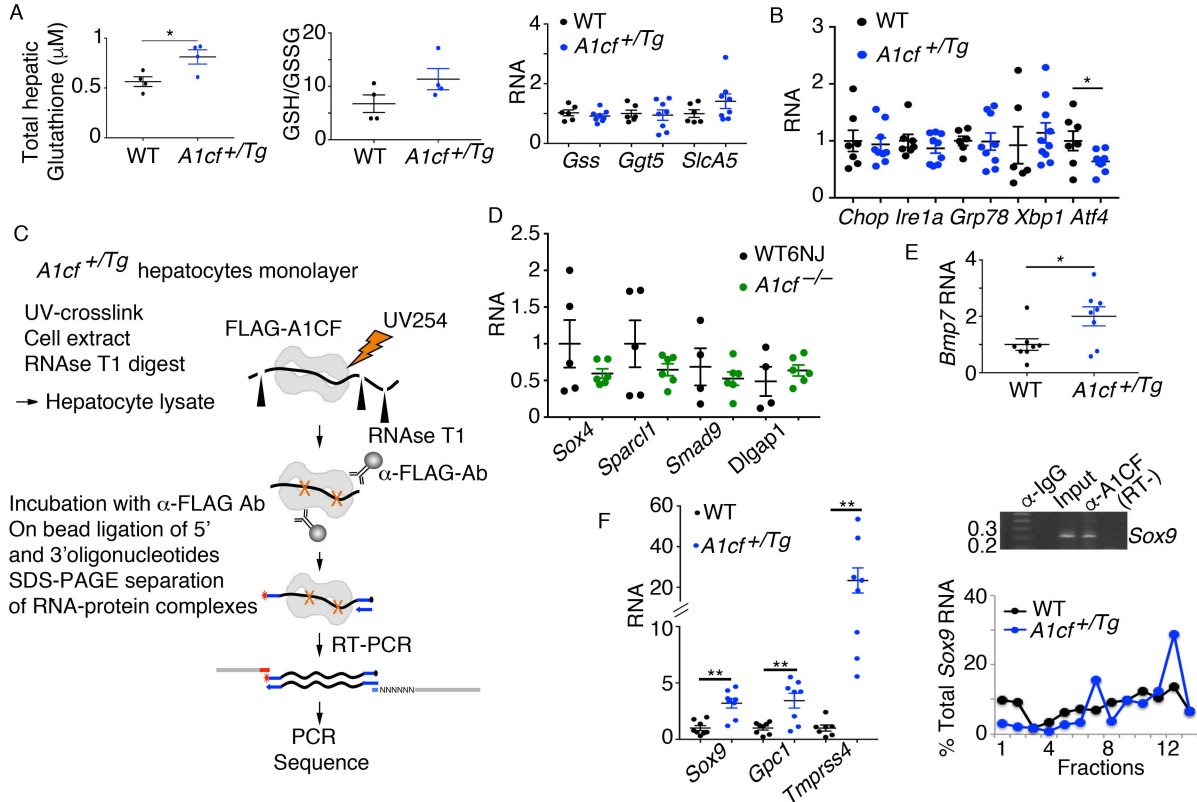

Supplemental Figure 7

**Supplemental Figure 7.** Oxidative stress characterization of young *A1cf*<sup>+Tg</sup> mice. **(A)** Hepatic glutathione levels in WT and *A1cf*<sup>+Tg</sup> liver. Levels of glutathione are represented both as total glutathione and as reduced to oxidized glutathione ratio. Data represent mean  $\pm$  SE (n=4); \*  $P < 0.05$  (unpaired t-test). QPCR expression of RNAs involved in glutathione synthesis (*Gss*, *Slc1A5*) and transport (*Ggt5*) (6-8 animals per genotype). Data represent mean  $\pm$  SE (unpaired t-test). **(B)** QPCR expression of ER-stress response related genes (6-9 animals per genotype). Data are mean  $\pm$  SE, \*  $P < 0.05$  (unpaired t-test). **(C)** Schematic of RNA-CLIP method as described in Methods. **(D)** QPCR expression of A1CF RNA targets differentially expressed in 12-week-old *A1cf*<sup>+Tg</sup> liver (see figure 9) in age-matched *A1cf*<sup>-/-</sup> livers. Data represent mean  $\pm$  SE, (n= 5-6). **(E)** QPCR expression of *Bmp7* RNA in liver from young *A1cf*<sup>+Tg</sup> mice, represented as mean  $\pm$  SE (n=8); \*  $P < 0.05$  (unpaired t-test). **(F)** Left, Increased expression of RNAs involved in organogenesis in 12-week-old chow-fed *A1cf*<sup>+Tg</sup> liver. QPCR from 7-8 animals per genotype. Data represent mean  $\pm$  SE, \*  $P < 0.05$ ; \*\*  $P < 0.01$  (unpaired t-test). Right top panel, representative image of 3 independent co-immunoprecipitations (IP) of A1CF and Sox9 RNA from whole liver extract. Control immunoprecipitation with IgG was performed to confirm the specificity of anti-A1CF antibody. Sox9 RNA was detected only in input fraction (total RNA before IP) and in the A1CF-specific IP. Right lower panel, polysomal distribution of Sox9 RNA from sucrose gradient-fractionated hepatic cytoplasmic extracts isolated from *A1cf*<sup>+Tg</sup>. Sox9 RNA in each fraction was analyzed by QPCR. Data are means of 2 separate isolations per genotype.

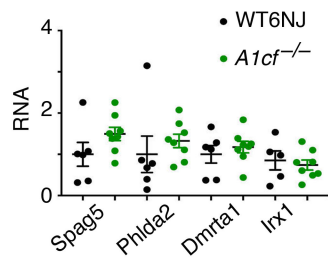

Supplemental Figure 8

**Supplemental Figure 8.** Gain/loss of function effect on differentially expressed A1CF RNA targets identified in 12 month-old *A1cf*<sup>+/Tg</sup> mice. Expression of A1CF RNA targets identified by RNA-Seq in aged *A1cf*<sup>+/Tg</sup> mice (Figure 12) was compared by QPCR in the aged *A1cf*<sup>-/-</sup> liver. Data represent mean  $\pm$  SE, n= 5-8 animals per genotype (unpaired t-test).

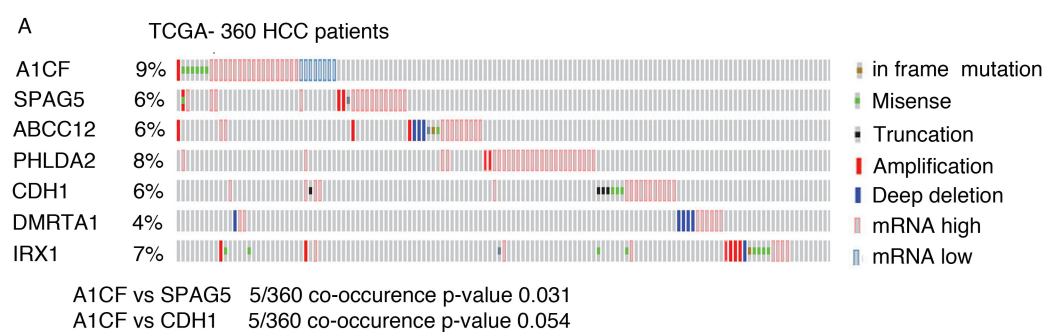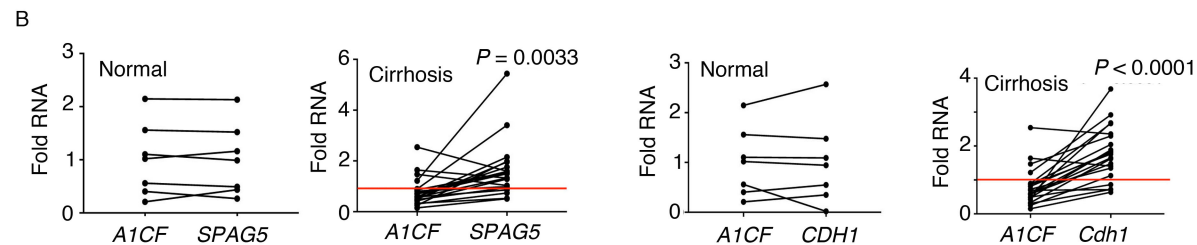

Supplemental Figure 9

**Supplemental Figure 9.** Expression of A1CF RNA targets in human HCC. **(A)** Oncoprint representing distribution of genetic alterations of A1CF RNA targets differentially expressed in 12-month-old *A1cf*<sup>+/Tg</sup> mice in 366 patients with liver hepatocellular carcinoma (HCC) from TCGA database (cbioportal.org). Genetic alterations are indicated to the right. The percentage associated with each gene indicates the number of patients with a genetic alteration of the given gene over the total number of profiled patients. Below the oncoprint are indicated two A1CF RNA-CLIP targets (*SPAG5*, *CDH1*) whose genetic alteration significantly co-occurs with A1CF alteration. **(B)** Comparison of expression of *A1CF*, *SPAG5* and *CDH1* RNAs in 21 cirrhotic human liver samples. Expression of individual RNAs by QPCR was evaluated in relation to 7 normal human livers. Fold expression in normal tissue is indicated as 1 (red line). Fold expression of *SPAG5* and *CDH1* RNAs was then separately compared to *A1CF* RNA among categories. *P* values are indicated on top of each graph (unpaired t-test).

**Table 1.** Pathological analysis of 12 month-old *A1cf<sup>+/-Tg</sup>* livers.

|                        | WT | <i>A1cf<sup>+/-Tg</sup></i> | <i>A1cf<sup>+/-Tg</sup></i><br><i>Apobec1<sup>-/-</sup></i> | WT6NJ | <i>A1cf<sup>-/-</sup></i> |
|------------------------|----|-----------------------------|-------------------------------------------------------------|-------|---------------------------|
| # Animals              | 7  | 13                          | 10                                                          | 7     | 10                        |
| No lesion              | 7  | 1                           | 0                                                           | 7     | 10                        |
| Non dysplastic lesions | 0  | 1                           | 5                                                           | 0     | 0                         |
| Dysplastic lesions     | 0  | 7                           | 4                                                           | 0     | 0                         |
| HCC                    | 0  | 4                           | 1                                                           | 0     | 0                         |

**Table 2.** Pathological analysis of livers of 6 month-old TFF fed *A1cf*<sup>+Tg</sup>.

|                        | WT | <i>A1cf</i> <sup>+Tg</sup> | WT6NJ | <i>A1cf</i> <sup>-/-</sup> |
|------------------------|----|----------------------------|-------|----------------------------|
| Animals                | 8  | 14                         | 9     | 12                         |
| No lesion              | 8  | 5                          | 9     | 12                         |
| Non Dysplastic lesions | 0  | 2                          | 0     | 0                          |
| Dysplastic lesions     | 0  | 7                          | 0     | 0                          |



**Table 3.** Distribution of patients by A1CF expression category in uninvolved and tumor tissue.

| A1CF expression<br>Category | Number of patients |       |
|-----------------------------|--------------------|-------|
|                             | Uninvolved         | Tumor |
| 1                           | 39                 | 36    |
| 2                           | 45                 | 36    |
| 3                           | 23                 | 30    |
| 4                           | 20                 | 35    |
| Total                       | 127                | 137   |

**Supplemental Table S1.** 3'UTR sequences of A1CF RNA targets identified by RNA-CLIP and differentially expressed in *A1cf*<sup>+/-Tg</sup> mice.

| Gene           | Length<br>(nt) | A    | U    | A and U | % AU  | AUUUA | Poly(U)<br>(5U) | Poly(U)<br>> 6U |
|----------------|----------------|------|------|---------|-------|-------|-----------------|-----------------|
| <i>Sox4</i>    | 2807           | 819  | 858  | 1677    | 59.74 | 4     | >20             | 14 (+)          |
| <i>Sox9</i>    | 2247           | 644  | 788  | 1432    | 63.73 | 6     | >20             | 13 (+)          |
| <i>Sparcl1</i> | 441            | 151  | 138  | 289     | 65.53 | 0     | 0               | 0               |
| <i>Dlgap1</i>  | 3179           | 976  | 920  | 1896    | 59.64 | 12    | 11 (+)          | 4 (+)           |
| <i>Smad9</i>   | 3767           | 1105 | 1038 | 2143    | 56.9  | 8     | 9 (+)           | 3 (+)           |
| <i>Dram1</i>   | 1937           | 536  | 557  | 1093    | 56.43 | 6     | 6 (+)           | 2 (+)           |
| <i>Phlda2</i>  | 268            | 57   | 73   | 130     | 48.51 | 1     | 2 (+)           | 2 (+)           |
| <i>Cdh1</i>    | 1647           | 446  | 490  | 936     | 56.83 | 2     | 8 (+)           | 4 (+)           |
| <i>Irx1</i>    | 402            | 108  | 113  | 221     | 54.9  | 0     | 2 (+)           | 1 (+)           |
| <i>Dmrta1</i>  | 2490           | 827  | 813  | 1640    | 65.9  | 6     | 10 (+)          | 1 (+)           |
| <i>Abcc12</i>  | 377            | 95   | 85   | 180     | 47.74 | 0     | 0               | 0               |
| <i>Spag5</i>   | 258            | 83   | 67   | 150     | 58.14 | 2     | 0               | 0               |

(+) represents one poly(U) motif with the indicated number of uridines

**Supplemental Table S2.** Clinical and laboratory data for all hepatocellular cancer patients.

| <b>Parameter</b>                                             | <b>N (%) / mean (<math>\pm</math>SD)</b> |
|--------------------------------------------------------------|------------------------------------------|
| Gender                                                       |                                          |
| Female                                                       | 51 (37%)                                 |
| Male                                                         | 86 (63%)                                 |
| Age at diagnosis (year)                                      | 62.70 ( $\pm$ 14.3)                      |
| Body mass index (kg/m <sup>2</sup> )                         | 27.71 ( $\pm$ 5.7)                       |
| Obese (body mass index >30)                                  |                                          |
| No                                                           | 91 (72%)                                 |
| Yes                                                          | 35 (28%)                                 |
| Race                                                         |                                          |
| Caucasian                                                    | 96 (71%)                                 |
| African American                                             | 4 (3%)                                   |
| Asian                                                        | 8 (6%)                                   |
| Hispanic                                                     | 2 (1.5%)                                 |
| Unknown                                                      | 25 (18.5%)                               |
| Underlying liver disease                                     |                                          |
| HCV hepatitis                                                | 27 (20%)                                 |
| Alcoholic hepatitis                                          | 19 (14%)                                 |
| NAFLD                                                        | 19 (14%)                                 |
| HBV hepatitis                                                | 13 (9%)                                  |
| Alcoholic hepatitis and HCV hepatitis                        | 2 (1%)                                   |
| HBV and HCV hepatitis                                        | 1 (1%)                                   |
| Other/Unknown                                                | 56 (41%)                                 |
| Total follow-up (week)                                       | 193.3 ( $\pm$ 184.6)                     |
| Survival by the end of follow-up                             |                                          |
| Alive                                                        | 17 (12%)                                 |
| Dead                                                         | 120 (88%)                                |
| Recurrence follow-up (week)                                  | 111.9 ( $\pm$ 139.7)                     |
| Recurrence                                                   |                                          |
| No                                                           | 33 (30%)                                 |
| Yes                                                          | 77 (70%)                                 |
| Eastern cooperative oncology group (ECOG) performance status |                                          |
| 0                                                            | 77 (60%)                                 |
| 1                                                            | 40 (31%)                                 |
| 2                                                            | 10 (8%)                                  |
| 3                                                            | 2 (1%)                                   |
| Barcelona clinic liver cancer (BCLC) stage                   |                                          |
| 0                                                            | 7 (5%)                                   |
| 1                                                            | 46 (34%)                                 |
| 2                                                            | 18 (13%)                                 |

|                                                                                                                                                                 |                             |
|-----------------------------------------------------------------------------------------------------------------------------------------------------------------|-----------------------------|
| 3                                                                                                                                                               | 60 (44%)                    |
| 4                                                                                                                                                               | 5 (4%)                      |
| Tumor, Node, Metastasis (TNM) stage                                                                                                                             |                             |
| 1                                                                                                                                                               | 90 (75%)                    |
| 2                                                                                                                                                               | 8 (7%)                      |
| 3                                                                                                                                                               | 14 (11%)                    |
| 4                                                                                                                                                               | 8 (7%)                      |
| Tumor number                                                                                                                                                    |                             |
| 1                                                                                                                                                               | 91 (67%)                    |
| 2                                                                                                                                                               | 17 (13%)                    |
| 3                                                                                                                                                               | 9 (7%)                      |
| >3                                                                                                                                                              | 18 (13%)                    |
| Extent of liver fibrosis                                                                                                                                        |                             |
| 0                                                                                                                                                               | 45 (34%)                    |
| 1                                                                                                                                                               | 5 (4%)                      |
| 2                                                                                                                                                               | 9 (7%)                      |
| 3                                                                                                                                                               | 4 (3%)                      |
| 4                                                                                                                                                               | 70 (52%)                    |
| Alpha Fetoprotein (ng/mL)                                                                                                                                       | 23486.18 ( $\pm$ 184510.10) |
| Alkaline phosphatase (IU/L)                                                                                                                                     | 263.29 ( $\pm$ 346.1)       |
| Aspartate aminotransferase (IU/L)                                                                                                                               | 84.39 ( $\pm$ 84.1)         |
| Alanine transaminase (IU/L)                                                                                                                                     | 79.23 ( $\pm$ 83.2)         |
| Sodium (mEq/L)                                                                                                                                                  | 139.08 ( $\pm$ 3.6)         |
| Prothrombin time (seconds)                                                                                                                                      | 1.09 ( $\pm$ 0.2)           |
| White blood cell (count/ $\mu$ L)                                                                                                                               | 6442.86 ( $\pm$ 2990.8)     |
| Hemoglobin (g/dL)                                                                                                                                               | 13.26 ( $\pm$ 1.7)          |
| Platelet (count/ $\mu$ L)                                                                                                                                       | 212.00 ( $\pm$ 130)         |
| Total bilirubin (mg/dL)                                                                                                                                         | 1.20 ( $\pm$ 1)             |
| Creatinine (mg/dL)                                                                                                                                              | 1.13 ( $\pm$ 1)             |
| Albumin (g/dL)                                                                                                                                                  | 3.71 ( $\pm$ 0.6)           |
| Child-Pugh score                                                                                                                                                | 5.83 ( $\pm$ 1.4)           |
| Model for end-stage liver disease (MELD) score                                                                                                                  | 9.42 ( $\pm$ 3.72)          |
| SD: standard deviation; HCV: hepatitis C virus; HBV: hepatitis B virus; NAFLD: non-alcoholic fatty liver disease; IU: international unit; mEq: milliequivalent. |                             |

**Supplemental Table S3.** Multivariable Cox proportional-hazard model for overall survival of hepatocellular cancer patients.

| <b>Prognostic factor</b>                                           | <b>subgroups</b>         | <b>Hazard ratio</b> | <b>P value</b> |
|--------------------------------------------------------------------|--------------------------|---------------------|----------------|
| Eastern cooperative oncology group (ECOG) performance status       | 0                        | Reference           |                |
|                                                                    | 1                        | 1.45                | .2             |
|                                                                    | 2                        | 5.38                | <.001          |
| Alkaline phosphatase (IU/L)                                        | per 100-unit increments  | 1.05                | <.001          |
| White blood cell (count per $\mu$ L)                               | per 1000-unit increments | 1.09                | .09            |
| Tumor number                                                       | 1                        | Reference           |                |
|                                                                    | 2                        | 1.17                | .66            |
|                                                                    | 3                        | 3.38                | .02            |
|                                                                    | >3                       | 1.04                | .88            |
| TNM stage                                                          | 1                        | Reference           |                |
|                                                                    | 2                        | 0.53                | .35            |
|                                                                    | 3                        | 2.70                | .003           |
|                                                                    | 4                        | 2.17                | .06            |
| Total A1CF expression                                              | quartile 1               | Reference           |                |
|                                                                    | quartile 2               | 1.55                | .14            |
|                                                                    | quartile 3               | 1.66                | .05            |
|                                                                    | quartile 4               | 2.01                | .05            |
| TNM: tumor, node, metastasis; A1CF: APOBEC1 complementation factor |                          |                     |                |

**Supplemental Table S4.** Clinical and laboratory data for hepatocellular cancer patients with underlying NAFLD.

| Parameter                                                        | N (%) / mean ( $\pm$ SD) |
|------------------------------------------------------------------|--------------------------|
| Gender                                                           |                          |
| Female                                                           | 5 (26%)                  |
| Male                                                             | 14 (74%)                 |
| Age at diagnosis (year)                                          | 65.71 ( $\pm$ 10.5)      |
| Race                                                             |                          |
| Caucasian                                                        | 17 (89%)                 |
| Unknown                                                          | 2 (11%)                  |
| Body mass index (kg/m <sup>2</sup> )                             | 34.01 ( $\pm$ 4.7)       |
| Obese (body mass index >30)                                      |                          |
| No                                                               | 2 (11%)                  |
| Yes                                                              | 16 (89%)                 |
| Total follow-up (week)                                           | 188.64 ( $\pm$ 146.8)    |
| Survival                                                         |                          |
| Alive                                                            | 3 (16%)                  |
| Dead                                                             | 16 (84%)                 |
| Recurrence follow-up (week)                                      | 85.0 ( $\pm$ 84.6)       |
| Recurrence                                                       |                          |
| No                                                               | 5 (28%)                  |
| Yes                                                              | 13 (72%)                 |
| NAFLD: non-alcoholic fatty liver disease; SD: standard deviation |                          |

**Supplemental Table S5.** Multivariable Cox proportional-hazard model for overall survival of hepatocellular cancer patients with underlying NAFLD.

| <b>Prognostic factor</b>                                                       | <b>subgroups</b>      | <b>Hazard ratio</b> | <b>P value</b> |
|--------------------------------------------------------------------------------|-----------------------|---------------------|----------------|
| Time to the first recurrence (week)                                            | per 1-unit increments | 0.99                | .03            |
| Recurrence                                                                     | No                    | Reference           |                |
|                                                                                | Yes                   | 1.41                | .7             |
| Total A1CF expression                                                          | Quartile 1            | Reference           |                |
|                                                                                | Quartile 2            | 2.0                 | .5             |
|                                                                                | Quartile 3            | 8.10                | .01            |
|                                                                                | Quartile 4            | 8.64                | .002           |
| NAFLD: non-alcoholic fatty liver disease; A1CF: APOBEC1 complementation factor |                       |                     |                |

**Supplemental Table S6.** Demographic descriptors for Hong Kong patient cohort.

| <b>cDNA</b>  | <b>Sex/Age</b> | <b>Diagnosis</b>                                                                                                                           |
|--------------|----------------|--------------------------------------------------------------------------------------------------------------------------------------------|
| <b>306N</b>  | F/46           | CA colon to liver, Metastatic adenocarcinoma                                                                                               |
| <b>209N</b>  | M/43           | CA colon to liver, Metastatic adenocarcinoma                                                                                               |
| <b>215N</b>  | F/44           | CA colon to liver, Metastatic adenocarcinoma                                                                                               |
| <b>422N</b>  | F/31           | CA colon to liver, Metastatic adenocarcinoma                                                                                               |
| <b>227N</b>  | F/48           | CA colon to liver, Metastatic adenocarcinoma                                                                                               |
| <b>279N</b>  | M/69           | Autopsy. COD: Ruptured abdominal aortic aneurysm. Sever coronary atherosclerosis with acute myocardial infraction                          |
| <b>335N</b>  | M/53           | CA colon to liver, Metastatic adenocarcinoma                                                                                               |
| <b>C441</b>  | F/51           | Explanted liver, High grade dysplastic nodule, macroregenerative nodules; HBV-associated cirrhosis, chronic cholecystitis; cholelithiasis. |
| <b>C440</b>  | M/40           | Explanted liver, HBV-associated cirrhosis, fatty change with Mallory bodies                                                                |
| <b>C456</b>  | M/49           | Explanted liver, Active HBV-associated cirrhosis                                                                                           |
| <b>C231</b>  | M/39           | Explanted liver, Fibrosing cholestatic hepatitis                                                                                           |
| <b>C453</b>  |                | Explanted liver, HBV-associated cirrhosis, moderate activity, large regenerative nodules, chronic cholecystitis, cholelithiasis            |
| <b>C452</b>  | M/49           | Explanted liver; HBV-associated cirrhosis with severe activity, macroregenerative nodules                                                  |
| <b>ch281</b> | M/55           | Explanted liver. Cirrhosis in keeping with chronic Hep B                                                                                   |
| <b>ch253</b> | M/49           | Explanted liver, chronic Hep B virus associated cirrhosis with acute exacerbation: Cholestasis                                             |
| <b>ch229</b> | M/47           | Explanted liver, Chronic hepatitis in a background of cirrhosis (Scheuer grade 2, Stage 4), regenerate nodules formation                   |
| <b>ch279</b> | M/40           | Explanted liver. Chronic Hepatitis, grade 3 Stage 4 cirrhosis.                                                                             |
| <b>ch261</b> | M/52           | Explanted liver, Cirrhosis, compatible with HBV-related                                                                                    |
| <b>ch277</b> | M/43           | Explanted liver. Chronic Hep B cirrhosis: mild haemosiderosis                                                                              |
| <b>ch329</b> | F/55           | Explanted liver. Cirrhosis. Portal vein thrombus.                                                                                          |
| <b>ch263</b> | M/57           | Explanted liver, Submassive hepatic necrosis: chronic Hep B with bridging fibrosis                                                         |
| <b>ch361</b> | M/55           | Explanted liver. Cirrhosis and Hep B with siderosis                                                                                        |
| <b>ch246</b> | M/61           | Explanted liver, Hep B associated cirrhosis                                                                                                |
| <b>ch230</b> | M/58           | Explanted liver. Irregular cirrhosis with no malignancy                                                                                    |



|              |      |                                                                                                      |
|--------------|------|------------------------------------------------------------------------------------------------------|
| <b>ch295</b> | M/46 | Explanted liver. Hep B associated mild chronic Hepatitis with cirrhosis. Chronic cholecystitis       |
| <b>ch297</b> | F/61 | Explanted liver. Chronic Hep B with septal fibrosis & minimal activity; portal vein thrombosis       |
| <b>ch294</b> | M/49 | Explanted liver, HBV-associated cirrhosis, with mild activity, grade 2-3 siderosis. Caroli's disease |
| <b>ch225</b> | M/49 | Explanted liver, alcoholic cirrhosis, liver flukes                                                   |

**Supplemental Table S7. Antibodies.**

| <b>Antibodies</b> | <b>Species</b> | <b>Manufacturer</b>         | <b>Catalog #</b> | <b>WB</b> | <b>IH</b> |
|-------------------|----------------|-----------------------------|------------------|-----------|-----------|
| A1CF              | Rabbit         | *                           |                  | 1:3000    | 1:2000    |
| FLAG              | Rabbit         | ThermoScientific            | PA1-984B         | 1:1000    | 1:200     |
| CIDEA             | Rabbit         | Millipore                   | ABC350           | 1:600     | 1:100     |
| $\beta$ -CATENIN  | Mouse          | BD Biosciences              | 610154           | 1:2000    | 1:600     |
| CDH1              | Mouse          | Abcam                       | 76055            |           | 1:250     |
| CYCLIN D1         | Rabbit         | Abcam                       | 134175           |           | 1:100     |
| HSP70             | Rabbit         | Abcam                       | 2787             |           | 1:200     |
| GPC3              | Mouse          | ThermoScientific            | 1G12             |           | 1:100     |
| P62               | Rabbit         | Millipore                   | EP396            |           | 1:200     |
| APOB              | Rabbit         | **                          |                  | 1:4000    |           |
| CD36              | Goat           | R&D                         | AF2519           | 1:7000    |           |
| MOGAT1            | Rabbit         | ***                         |                  | 1:1000    |           |
| MOGAT2            | Rabbit         | Invitrogen                  | PA5-42625        | 1:1000    |           |
| ACTIN             | Rabbit         | Sigma                       | A2066            | 1:2000    |           |
| GAPDH             | Rabbit         | Santa Cruz<br>Biotechnology | Sc-25778         | 1:1000    |           |
| STAT3             | Mouse          | Cell Signaling              | 9139S            | 1:2000    |           |
| PSTAT3            | Rabbit         | Cell Signaling              | 9131S            | 1:1000    |           |

\* (67); \*\* (68)\*\*\* (69)

**Supplemental Table S8.** Quantitative PCR primers.

| <b>RNA</b>    | <b>Forward primer</b>            | <b>Reverse Primer</b>            |
|---------------|----------------------------------|----------------------------------|
| <i>Abcc12</i> | 5'-GAGGAGTTCAGGAGCTCAAGCA-3'     | 5'-AGACCCTGTATGGAGGAGGTGAT-3'    |
| <i>αfp</i>    | 5'-TCATGTATGCCCCAGCCATT-3'       | 5'-CAGCATGCCAGAACGACCTT-3'       |
| <i>Apob</i>   | 5'-AATATAATCGGAGAAGCAGGACCTA-3'  | 5'-TCCCGAAGTTGACATCAAACC-3'      |
| <i>αSma</i>   | 5'-CCAGAGCAAGAGAGGGATCCT-3'      | 5'-TGTCGTCCCAGTTGGTGATG-3'       |
| <i>Atf4</i>   | 5'-CGAGTTAAGCACATTCTTGAATC-3'    | 5'-TTCGTGTTCAGGAAGCTCAT-3'       |
| <i>Bmp7</i>   | 5'-CCTTCATGGTGGCCTTCTTC-3'       | 5'-CCCCGTGGACCGGATACTA-3'        |
| <i>Cbr3</i>   | 5'-AGAGGAAAGCGGACAGGATTC-3'      | 5'-TCGCCATGTCGGTCTTCA-3'         |
| <i>Ccr2</i>   | 5'-TCCACGGCATACTATCAACATCTC-3'   | 5'-GGCCCCTTCATCAAGCTCTT-3'       |
| <i>Cdh1</i>   | 5'-ACCCCTTACGACTCTCTGTTG-3'      | 5'-CAGGCTAGCGGCTTCAGAAC-3'       |
| <i>Cdh24</i>  | 5'-CGTACAGCCATCCCCAACAT-3'       | 5'-GCTTGAATCACCACCAAGAACTC-3'    |
| <i>Cdk1</i>   | 5'-GGACGAGAACGGCTTGGAT-3'        | 5'-ATTCGTTTGGCAGGATCATAGAC-3'    |
| <i>Cd36</i>   | 5'-TCTTCCAGCCAATGCCTTTG-3'       | 5'-TGGAGATTACTTTTTTCAGTGCAGAA-3' |
| <i>Chka</i>   | 5'-GGTCACTTGGGCCAAAACTC-3'       | 5'-CGCCGGCTCGGGATA-3'            |
| <i>Chop</i>   | 5'-CCACCACACCTGAAAGCAGAA-3'      | 5'-TGAAAGGCAGGGACTCA-3'          |
| <i>Cidea</i>  | 5'-CCAGAGTCACCTTCGACCTATACA-3'   | 5'-CATCGTGGCTTTGACATTGAGA-3'     |
| <i>Col1a1</i> | 5'-CACGGCTGTGTGCGATGA-3'         | 5'-TCGCCCTCCCGTCTTTG-3'          |
| <i>Col4a1</i> | 5'-CCAGGATGCAACGGTACAAA-3'       | 5'-AACGTGGCCGAGAATTTTAC-3'       |
| <i>Cxcl14</i> | 5'-GCACTGCCTGCACCCTAAG-3'        | 5'-TCGTTCCAGGCATTGTACCA-3'       |
| <i>Dlgap1</i> | 5'-GCAGCCGATGACGACTTTG-3'        | 5'-GTCCGGAGGAGGCAGGATAG-3'       |
| <i>Dmrta1</i> | 5'-CTGGTTCCAGCATTGCCTTT-3'       | 5'-ATCATCCCTGGAACGCATAA-3'       |
| <i>Dram1</i>  | 5'-GCCATCTCCGCTGTTTCGT-3'        | 5'-GGATTCCATTCCAGCTTGGTT-3'      |
| <i>Gapdh</i>  | 5'-TGTTGTCGTCGTGGATCTGA-3'       | 5'-CCTGCTTCACCACCTTCTTGA-3'      |
| <i>Ggt5</i>   | 5'-GGTTCCCGTGTGCCCTTTATC-3'      | 5'-GCCGCAGGATGCTGTTGT-3'         |
| <i>Gpc1</i>   | 5'-GGACATCACCAAGCCAGACA-3'       | 5'-CATAGGCGCCACGTAAACG-3'        |
| <i>Gpx3</i>   | 5'-TCACCTGGCCGCCTCTT-3'          | 5'-AAAGTTCAGCGGATGTCATG-3'       |
| <i>Grp78</i>  | 5'-ACCCCGAGAACACGGTCTT-3'        | 5'-GCTGCACCGAAGGGTCATT-3'        |
| <i>Gss</i>    | 5'-CATTGCCCAGACCGTGTTTC-3'       | 5'-TGCGCCGCACTGGAA-3'            |
| <i>Gstm3</i>  | 5'-TGCTGCAGTCCCGATTTTG-3'        | 5'-TTCTCAGGGATGGCCTTCAA-3'       |
| <i>Il19</i>   | 5'-GACATGCGCCTCATAGAAAAGA-3'     | 5'-ACAGGATGGTGACATTTTAAAGGT-3'   |
| <i>Jak3</i>   | 5'-TGCTGCCCTGAACCTAACATC-3'      | 5'-TTCGCACCACGATCAAATTG-3'       |
| <i>Kif20a</i> | 5'-ACCTAGCCATCAGCATAAGAGACA-3'   | 5'-CACGTAAGGATTGCCGTTCTG-3'      |
| <i>Klf4</i>   | 5'-ACCTATAACCAAGAGTTCTCATCTCAA3' | 5'-CCGTCCCAGTCACAGTGGTAA-3'      |
| <i>Ly6c</i>   | 5'-GGATTCTGCATTGCTCAAAACA-3'     | 5'-CTGACGGGTCTTTAGTTTCCTTCT-3'   |
| <i>Mcm2</i>   | 5'-GTTTCAGCGTCATGCGGAGTAT-3'     | 5'-TCTCGCCGGAAGGAGAGATA-3'       |
| <i>Mcm4</i>   | 5'-CCAACCCAGTCCCTTCGAA-3'        | 5'-TCGCCTCTACGTCTCCGATT-3'       |
| <i>Mcm6</i>   | 5'-TGTCAGCGCCCATCATGT-3'         | 5'-CATTGCATTTCATCCACCAGAA-3'     |
| <i>Mmp2</i>   | 5'-CTATGTCCACTGTGGGTGGAAA-3'     | 5'-TTGTTGCCCAGGAAAGTGAAG-3'      |
| <i>Mogat1</i> | 5'-ACCACAAATCCTGCGAAAGG-3'       | 5'-TGTTGAGTGGCGCGAACTC-3'        |
| <i>Mogat2</i> | 5'-CTGATGATGCTGACTGTGTGGTT-3'    | 5'-CCAGCCCCCAGACATG-3'           |

|                                       |                                 |                                  |
|---------------------------------------|---------------------------------|----------------------------------|
| <b><i>Pbrm1</i></b>                   | 5'-GGTGTTACAGCGACTCCTTAGCA-3'   | 5'-CCGATACCGATTACTTTCAACATTT-3'  |
| <b><i>Phlda2</i></b>                  | 5'-ACCGCCTGCGCCTCTT-3'          | 5'-TGGAGTGGAACAGCTCCTT-3'        |
| <b><i>Rb1</i></b>                     | 5'-TCCACCAGGCCTCCTACCT-3'       | 5'-GAATCCGTAAGGGTGAAGTAGAAAAC-3' |
| <b><i>Sall2</i></b>                   | 5'-TCCACCTTCGTTCCCACACT-3'      | 5'-CCGAGTTGTGAAACGGTTACC-3'      |
| <b><i>Scd2</i></b>                    | 5'-GTACCGCTGGCACATCAACTT-3'     | 5'-ACACTCTCTTCCGGTCGTAAGC-3'     |
| <b><i>Slc1a5</i></b>                  | 5'-GCCAGCAAGATTGTGGAGATG-3'     | 5'-TGTATTTGCCGAGGCTGATG-3'       |
| <b><i>Smad9</i></b>                   | 5'-AAAACACCAGGAGGCACATTG-3'     | 5'-ACCTCGCCCCAACGTA-3'           |
| <b><i>Sox4</i></b>                    | 5'-GGCTAGGCAAACGCTGGAA-3'       | 5'-TCCTGGATGAACGGAATCTTG-3'      |
| <b><i>Sox9</i></b>                    | 5'-CGGCTCCAGCAAGAACAAG-3'       | 5'-TGCGCCACACCATGA-3'            |
| <b><i>Spag5</i></b>                   | 5'-TTGCAGCAGGACTGGACATC-3'      | 5'-TCGAGACCAACTCAGCAAAGC-3'      |
| <b><i>Sparcl1</i></b>                 | 5'-CTCGCTTCTTTGAGGAGTGTGA-3'    | 5'-TGGCCCCATTCTTCAAG-3'          |
| <b><i>Spp1</i></b>                    | 5'-TTTCACTCCAATCGTCCCTACA-3'    | 5'-TCAGTCCATAAGCCAAGCTATCAC-3'   |
| <b><i>Tmp1</i></b>                    | 5'-CATGGAAAGCCTCTGTGGATATG-3'   | 5'-GATGTGCAAATTTCCGTTCTT-3'      |
| <b><i>Tmprss4</i></b>                 | 5'-CCTGCAGACAGATGGGCTATG-3'     | 5'-GGTTCTGATCTGGACGGATCTC-3'     |
| <b><i>Tnf <math>\alpha</math></i></b> | 5'-TACCTTGTCTACTCCCAGGTTCTCT-3' | 5'-GTGTGGGTGAGGAGCACGTA-3'       |
| <b><i>Xbp1</i></b>                    | 5'-ATCAGCTTTTACGGGAGAAAATC-3'   | 5'-CCATTCCAAGCGTGTTCCTT-3'       |
| <b><i>Xpo4</i></b>                    | 5'-GCAGTGCCTTGCCAGTT-3'         | 5'-AATCAACCTGGGATCCTTCGT-3'      |
